# Supplementary material for: [Retracted] Quercetin Prevents Radiation‐Induced Oral Mucositis by Upregulating BMI‐1
Source: Hindawi journal article supplement (doi:10.1155/2021/2231680), 2021-01-01
Supplement: f1 [file 2231680.f1.docx]

**Supplement materials**


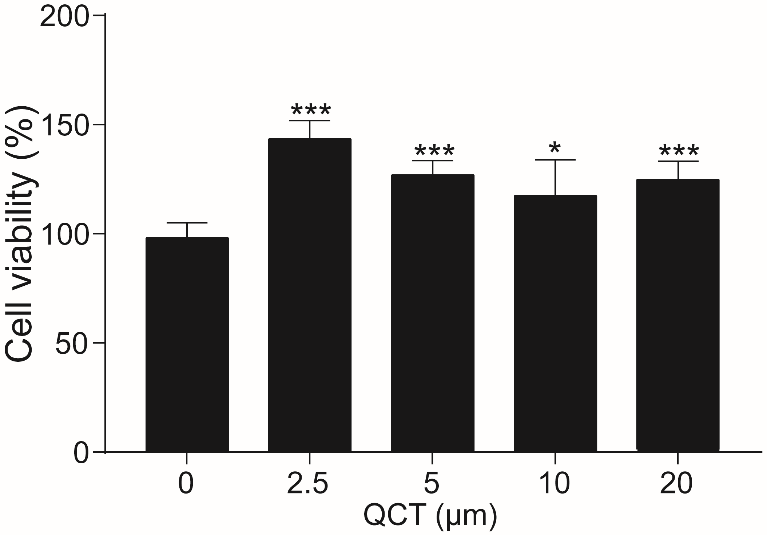


**Fig. S1.** Effect of quercetin on proliferation of NHKs. The survival of NHKs was detected by CCK8 assay after treatment with different doses of quercetin (0-20µM) for 24 h.* *P*<0.05, ****P*<0.001 *vs*. control cells.

**Table. S1.** Primary antibodies for western blot, IF and IHC.

| Protein | Name | Catalog number | Species | Mono or polyclonal | Dilution | Purpose |
| --- | --- | --- | --- | --- | --- | --- |
| γ-H2AX | p-Histone H2A.X(Ser 139) | sc-517348 (SANTA CRUZ) | Mouse | monoclonal | 1:1000  1:200  1:50 | WB  IF  IHC |
| PCNA | PCNA (D3H8P) | #13110(CST) | Rabbit | monoclonal | 1:1000 | WB |
| Ki-67 | Ki67 (SP6) | ab16667(abcam) | Rabbit | monoclonal | 1:200 | IHC |
| p47 | p47 (D-9) | sc-365215  (SANTA CRUZ) | Mouse | monoclonal | 1:1000 | WB |
| p21 | p21(EPR3993) | ab109199(abcam) | Rabbit | monoclonal | 1:1000 | WB |
| p65 | NF-κb (D14E12) | #8242(CST) | Rabbit | monoclonal | 1:1000 | WB |
| p-p65  (Ser536） | Phospho-NF-κB(Ser 536) | sc-136548 | Mouse | monoclonal | 1:1000  1:50 | WB  IHC |
| IκB | IκBα (L35A5) | #4814(CST) | Rabbit | monoclonal | 1:1000 | WB |
| p-IκB  (Ser32) | Phospho-IκBα (Ser32)(14D4) | #2859(CST) | Rabbit | monoclonal | 1:1000 | WB |
| BMI-1 | BMI-1(2823) | ab269678(abcam) | Mouse | monoclonal | 1:1000  1:200 | WB  IHC |
| Snail | Snail (C15D3) | #3879(CST) | Rabbit | monoclonal | 1:1000 | WB |
| β-Actin | β**-**Actin (8H10D10) | #3700(CST) | Mouse | monoclonal | 1:1000 | WB |
| 8-OHDG | 8-OHdG(F-12) | sc-393870  (SANTA CRUZ) | Mouse | monoclonal | 1:50 | IHC |

| Gene | **Forward primer** | **Reverse primer** |
| --- | --- | --- |
| mus-BMI-1 | ATCCCCACTTAATGTGTGTCCT | CTTGCTGGTCTCCAAGTAACG |
| mus-p21 | CCTGGTGATGTCCGACCTG | CCATGAGCGCATCGCAATC |
| mus-p16 | CGCAGGTTCTTGGTCACTGT | TGTTCACGAAAGCCAGAGCG |
| mus-IL-1β | GCAACTGTTCCTGAACTCAACT | ATCTTTTGGGGTCCGTCAACT |
| mus-TNF-α | CCTGTAGCCCACGTCGTAG | GGGAGTAGACAAGGTACAACC |
| mus-TGF-β1 | AGGGCTACCATGCCAACTTC | CCACGTAGTAGACGATGGGC |
| mus-IL-6 | TAGTCCTTCCTACCCCAATTTCC | TTGGTCCTTAGCCACTCCTTC |
| mus-MIP-1β | TTCCTGCTGTTTCTCTTACACCT | CTGTCTGCCTCTTTTGGTCAG |
| mus-GAPDH | GGCTGTATTCCCCTCCATCG | CCAGTTGGTAACAATGCCATGT |
| hsa-TNF-α | TGCACTTTGGAGTGATCGGC | CTCAGCTTGAGGGTTTGCTAC |
| hsa-TGF-β1 | GGCCAGATCCTGTCCAAGC | GTGGGTTTCCACCATTAGCAC |
| hsa-IL-1β | AAGCAGCCATGGCAGAAGTA | GGTGGTCGGAGATTCGTAGC |
| hsa-GAPDH | GGAGTCAACGGATTTGGT | GTGATGGGATTTCCATTGAT |

**Table. S2.**Primer sequences for quantitative RT-PCR

**Table. S3**. Clonogenic survival parameters fitting the data to a multitarget model.

|  | ***D*0** | ***D*q** | **SER** |
| --- | --- | --- | --- |
| **NHK/Con** | 3.11 | 1.15 | - |
| **NHK/QCT** | 2.66 | 2.00 | 0.58 |

Quercetin decreased radiosensitivity in NHK. NHK/Control and NHK/QCT were cultured in 6 well plates for 24 h, and then irradiated at the indicated doses. After 10 days, the colonies were counted.The equation of SF = 1-(1-e-D/D0) N was applied to calculate the cellular radiosensitivity (mean lethal dose, D0) and the capacity for sublethal damage repair (quasithreshold dose, Dq). Those values were then used to calculate the sensitization enhancement ratio (SER). Quercetin increased the plating efficiency and decreased the radiosensitivity of NHK, with a SER of 0.58.
